# Supplementary material
Source: MDPI journal article supplement (https://www.mdpi.com/2071-1050/13/19/10933)
Supplement: s1 [file s1]

Map 1: Types of hazards covered in the studies

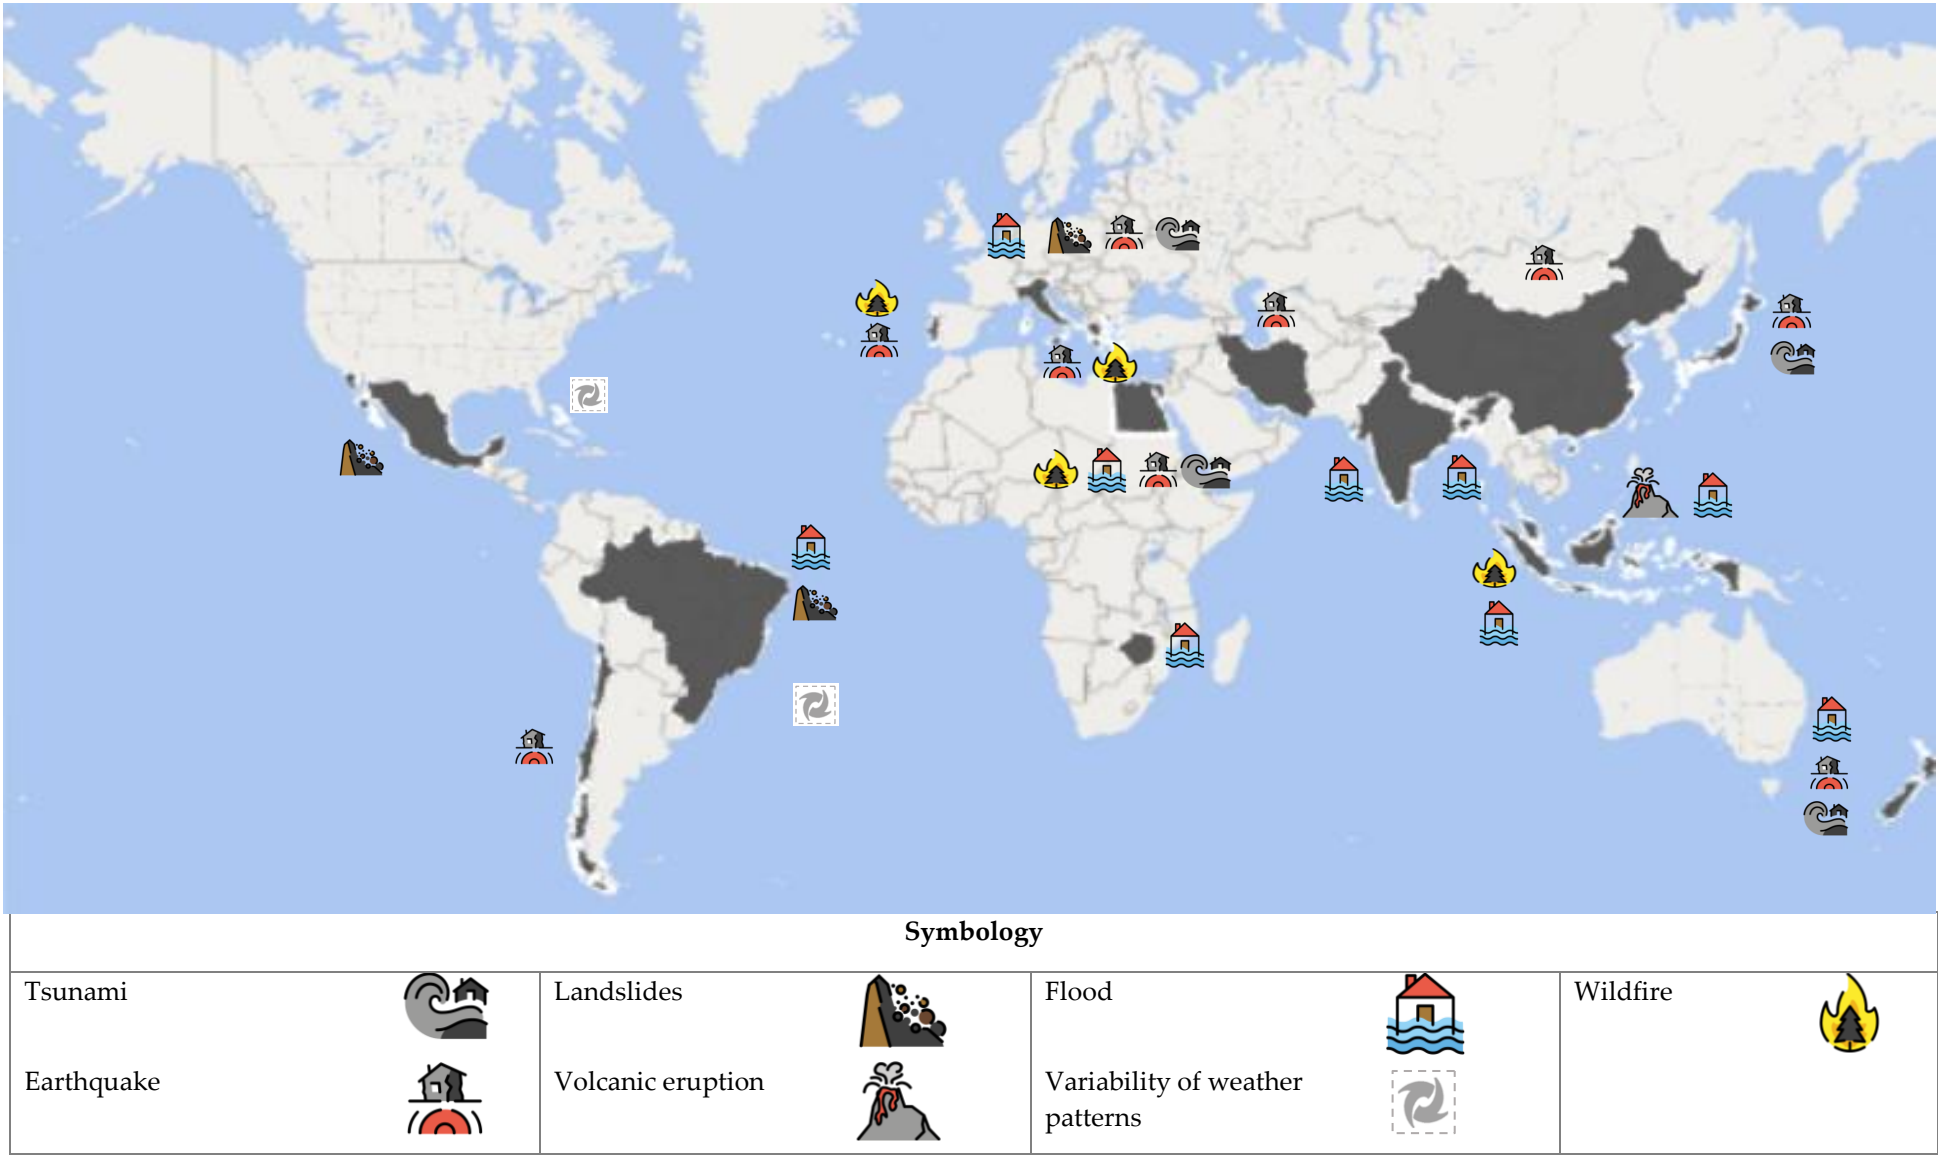

Map 2: Number of articles about disaster risk reduction education connected to SDGs

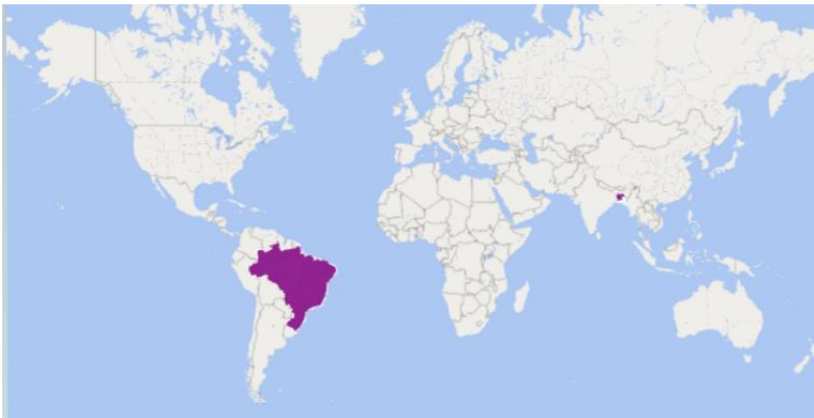

SDG 1 No poverty

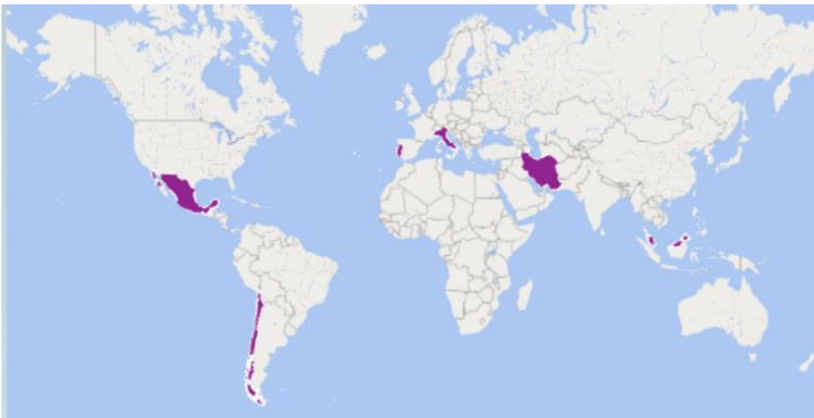

SDG 3 Good health and well-being

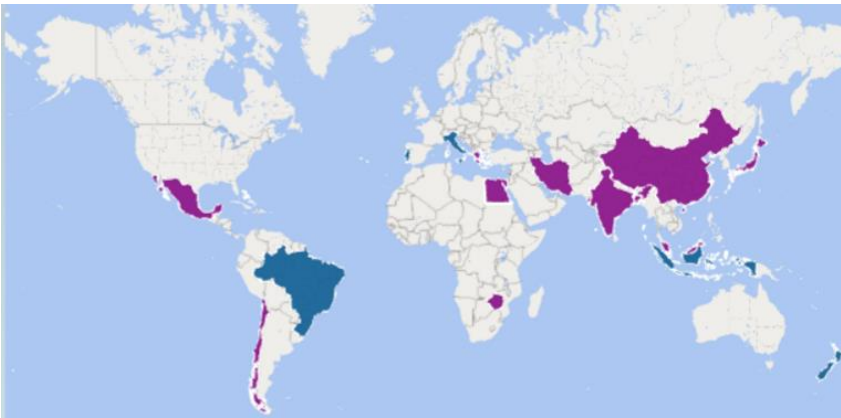

SDG 4 Quality education

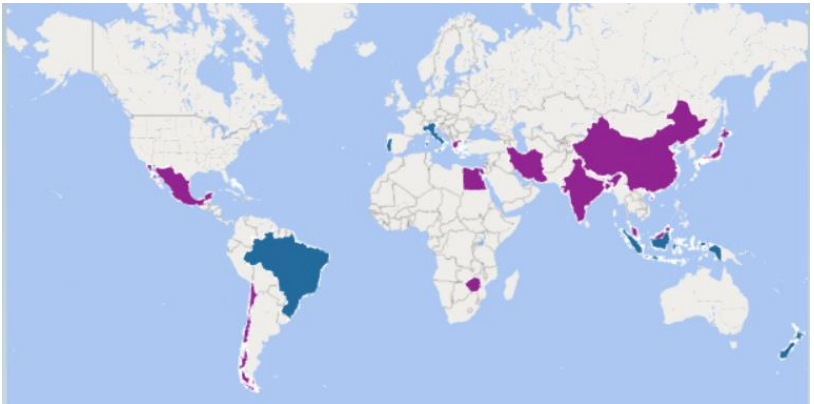

SDG 11 Sustainable cities and communities

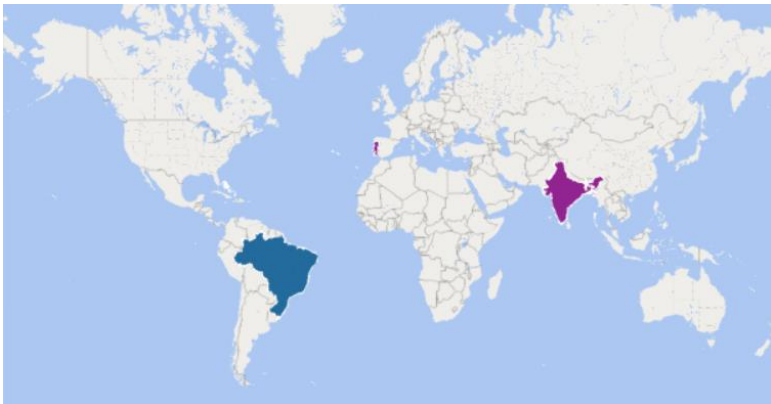

SDG 13 Climate action

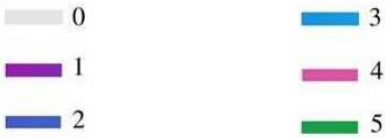

Number of articles
